# Supplementary material for: Photoelectric Characteristics of a Large-Area n-MoS2/p-Si Heterojunction Structure Formed through Sulfurization Process
Source: MDPI journal article supplement (doi:10.3390/s20247340), 2020-12-21
Supplement: s1 [file s1]

## **Supplementary Material**

### **Photoelectric characteristics of a large-area n-MoS<sub>2</sub>/p-Si heterojunction structure formed through sulfurization process**

Yoonsok Kim, Taeyoung Kim, and Eun Kyu Kim\*

*Department of Physics and Research Institute of Natural Science, Hanyang University,  
Seoul 04763, South Korea*

\* E-mail : [ek-kim@hanyang.ac.kr](mailto:ek-kim@hanyang.ac.kr)

## Raman spectroscopy

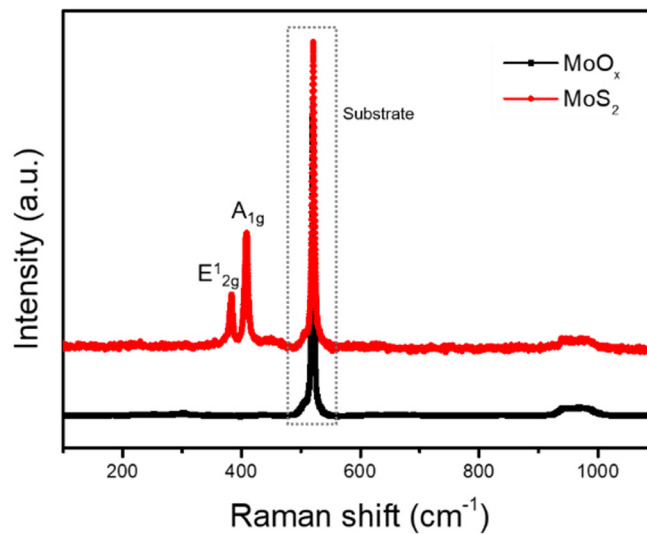

**Figure. S1** Raman spectroscopy of the MoO<sub>x</sub> and MoS<sub>2</sub> films.

Figure S1. displays Raman spectroscopy results of MoO<sub>x</sub> and MoS<sub>2</sub> films in the ranges from 100 to 1100 cm<sup>-1</sup>. No peaks are observed for thermally evaporated MoO<sub>x</sub> film but only substrate peaks. This indicates that the MoO<sub>x</sub> film is amorphous structure, same as XRD analysis. This result is consistent with the previous report [1]. While typical two phonon vibration modes were observed on the sulfurized MoS<sub>2</sub> film, E<sup>1</sup><sub>2g</sub> and A<sub>1g</sub> phonon vibration mode.

[1] C. Battaglia, X. Yin, M. Zheng, I.D. Sharp, T. Chen, S. McDonnell, Angelica Azcatl, Carlo Carraro, Biwu Ma, Roya Maboudian, Robert. M. Wallace, and Ali Javey, Hole selective MoO<sub>x</sub> contact for silicon solar cells, Nano Lett. 14 (2014) 967-971.

Three points of Raman spectra on sulfurized MoS<sub>2</sub> film.

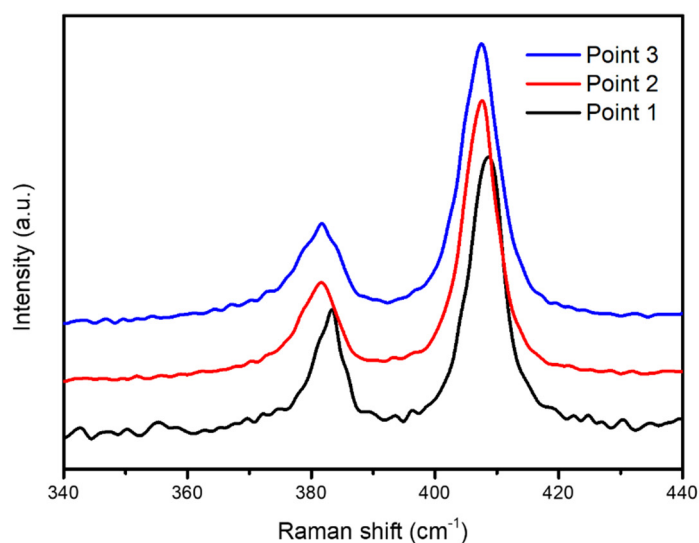

**Figure. S2** Raman spectra of the sulfurized MoS<sub>2</sub> films on three points.

Figure S2 shows Raman spectra of randomly measured three random points on the sulfurized MoS<sub>2</sub> film. The data display two phonon vibration modes, E<sub>2g</sub><sup>1</sup> and A<sub>1g</sub>, at the same position which indicate that the sulfurized film has homogeneity in the direction of parallel to the surface.

## Grain size calculation from XRD profile

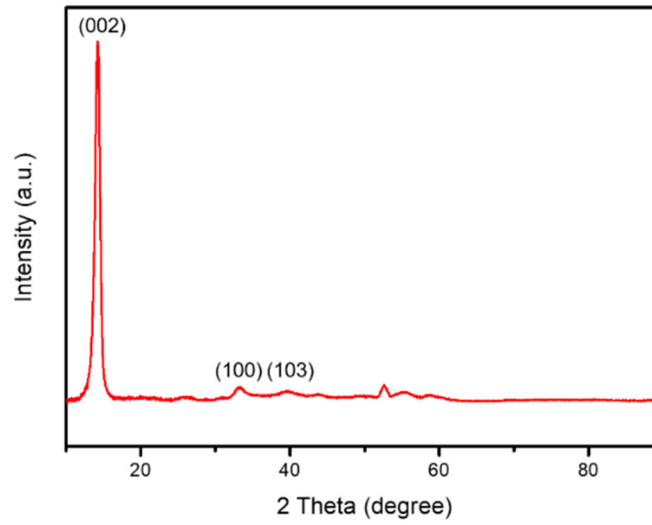

**Figure. S3** XRD data of the sulfurized MoS<sub>2</sub> film.

We tried to extract the grain size from the XRD data of the sulfurized MoS<sub>2</sub> film, which have (002)-oriented peak as the main dominant peak, as shown in the Figure S3. The average grain size was extracted to be about 10 nm by Scherrer equation at the (002)-oriented peak.

$$d = \frac{c\lambda}{\beta \cos \theta}$$

Here,  $c$  is a shape factor taken as 0.9,  $\lambda$  is the X-ray wavelength of Cu K-Alpha (1.5406 Å),  $\beta$  is peak width at FWHM (0.79°), and  $\theta$  is the peak angle (14.20°).

## O 1s core level of XPS peak

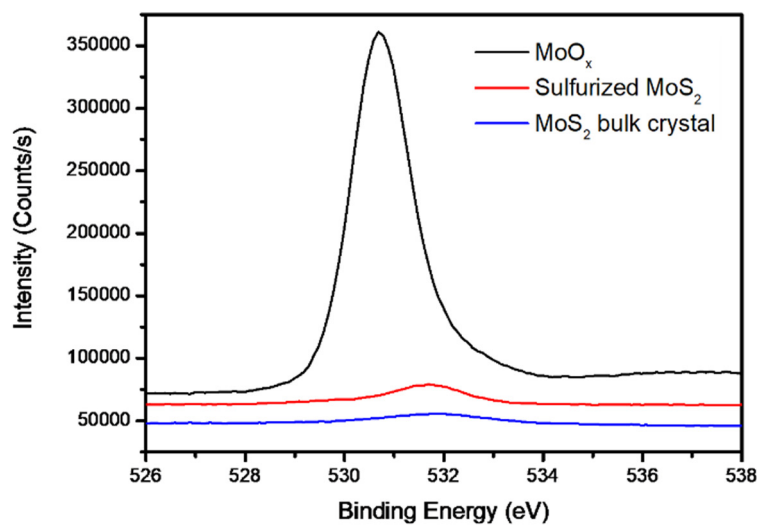

**Figure. S4** XPS data of O 1s core level from MoO<sub>x</sub>, sulfurized MoS<sub>2</sub>, and MoS<sub>2</sub> bulk crystal.

We compared also the XPS data of O 1s core level. Mo:O ratio from MoO<sub>x</sub> film, sulfurized MoS<sub>2</sub> film, and MoS<sub>2</sub> bulk crystal appeared 1:2.9, 1:0.3 and 1:0.19, respectively. Also, Mo:S ratio was calculated to be 1:2.4 and 1:2.2 for sulfurized MoS<sub>2</sub> film and MoS<sub>2</sub> bulk crystal, respectively. The Mo:S ratio of the sulfurized film was calculated from the Figure 2c, d. This result indicate that the MoO<sub>x</sub> film transformed to MoS<sub>2</sub> film.

## Response time measurement

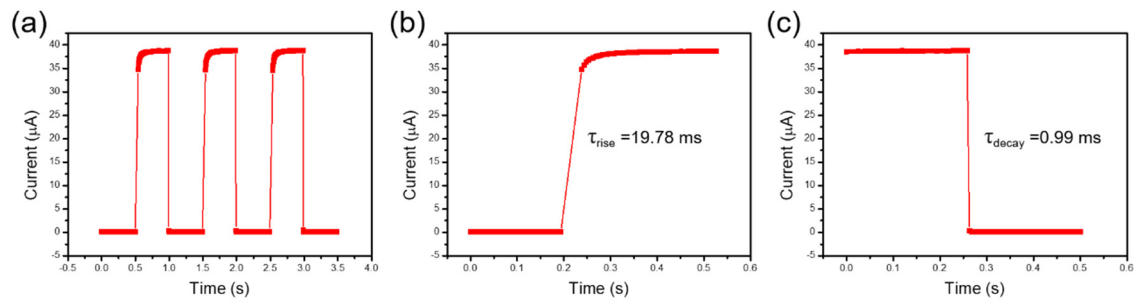

**Figure. S5** (a) Photocurrent transient characteristics under square pulsed light illumination of 780nm wavelength at reverse bias of -1 V. (b) The rising and (c) the decaying transients.

Figure S5 represent the response time of the n-MoS<sub>2</sub>/p-Si heterojunction. The device shows excellent repeatability and stability. Also, the rise and decay times were calculated to be 19.78 ms and 0.99 ms, respectively.
